# Supplementary material
Source: PubMed Central journal article supplement (PMC6231175)
Supplement: ml8b00397_si_001.pdf [file ml8b00397_si_001.pdf]

# Supporting Information

## Prediction of drug-target binding kinetics by Comparative Binding Energy analysis.

Gaurav K. Ganotra<sup>a,c</sup> and Rebecca C. Wade<sup>a,b,c\*</sup>

<sup>a</sup>Molecular and Cellular Modeling Group, Heidelberg Institute for Theoretical Studies, Schloss-Wolfsbrunnenweg 35, 69118 Heidelberg, Germany

<sup>b</sup>Center for Molecular Biology (ZMBH), DKFZ-ZMBH Alliance, Heidelberg University, Im Neuenheimer Feld 282, 69120 Heidelberg, Germany

<sup>c</sup>Interdisciplinary Center for Scientific Computing (IWR), Heidelberg University, Im Neuenheimer Feld 205, Heidelberg, Germany

\*Corresponding author

Email Id: [Gaurav.ganotra@h-its.org](mailto:Gaurav.ganotra@h-its.org), [Rebecca.wade@h-its.org](mailto:Rebecca.wade@h-its.org)

# Table of Content

## Supplementary Methods

## Supplementary Figures

- S1. Schematic outline of the different steps involved in applying COMBINE analysis.
- S2. Coulombic and Lennard-Jones interaction energies between amino acid residues of N-HSP90 and its inhibitors.
- S3. Coulombic and Lennard-Jones interaction energies between amino acid residues of HIV-1 protease and its inhibitors.
- S4. 2D chemical structures of inhibitors of N-HSP90 used for the COMBINE analysis.
- S5. 2D chemical structures of inhibitors of HIV-1 protease used for the COMBINE analysis.

## Supplementary Tables

- S1. Summary of the models derived for different numbers of latent variables (LVs) for the COMBINE analysis for  $k_{off}$  rate constants of N-HSP90 inhibitors.
- S2. Comparison of  $\log(k_{off})$  values calculated by the COMBINE analysis model and the experimental  $\log(k_{off})$  values for different N-HSP90 inhibitors used in the training set.
- S3. Comparison of  $\log(k_{off})$  values predicted by the COMBINE analysis model and the experimental  $\log(k_{off})$  values for different N-HSP90 inhibitors used in the test set.
- S4. Summary of the models derived for different numbers of latent variables (LVs) for the COMBINE analysis for  $k_{off}$  rate constants of HIV-1 protease inhibitors.
- S5. Comparison of  $\log(k_{off})$  values calculated by the COMBINE analysis model and the experimental  $\log(k_{off})$  values for different HIV-1 protease inhibitors used in the training set.
- S6. Summary of the models derived for different numbers of latent variables (LVs) for the COMBINE analysis for equilibrium dissociation constant ( $K_D$ ) values of the N-HSP90 inhibitors.
- S7. Statistical measures of correlation for the COMBINE analysis model derived for equilibrium dissociation constant ( $K_D$ ) values of N-HSP90 inhibitors.
- S8. Summary of the models derived for different numbers of latent variables (LVs) for the COMBINE analysis for equilibrium dissociation constant ( $K_D$ ) values for the HIV-1 protease inhibitors.
- S9. Statistical measures of correlation for the COMBINE analysis model derived for  $K_D$  values of HIV-1 protease inhibitors.
- S10. Statistical measures of correlation for the COMBINE analysis model derived for  $K_D$  values for the resorcinol series of inhibitors of N-HSP90.
- S11. List of the SMILES strings for the N-HSP90 inhibitors.
- S12. List of the SMILES strings for the HIV-1 protease inhibitors.

## Formulas for statistical measures of correlation

## References

## Data files for performing COMBINE analysis (ZIP)

## Supplementary Methods

Structures of protein-inhibitor complexes for HSP90 and HIV-1 protease were either obtained from crystal structures downloaded from the PDB database or modeled by analogy by introducing small substitutions into crystal structures of similar compounds complexed with the proteins. The Protein Preparation wizard of the Schrodinger suite (Release 2015-4) was used to pre-process the structures of the bound complexes, to add missing side chains, to add disulphide bonds, and for optimizing the H-bond network to assign hydrogen atom positions. The protonation states were assigned at pH 7.0. Crystallographic waters were deleted after optimizing the H-bond network. To get rid of any bad contacts or steric clashes, all of the structures were subjected to the default energy minimization procedure in Schrodinger using the Impref module<sup>1</sup> and the OPLS3 force field. The Impref minimization involves a two-step relaxation in which first the rotatable hydrogen atoms are minimized with all the torsional potentials removed, and then an all-atom minimization is performed that is terminated either when the system is fully converged or when it reaches a heavy-atom RMSD from the initial structure of 0.30 Å.

The force field parameters and topology files for all the systems were constructed using the LEap program of the Amber14 software<sup>2</sup>. ff14SB<sup>3</sup> was used for the proteins and the inhibitor parameters were generated based on the general Amber force field (GAFF). The partial atomic charges of the inhibitors were calculated using the RESP<sup>4</sup> program to fit the atom-centered charges to the molecular electrostatic potential grid computed using the GAMESS program<sup>5</sup>. Then, all the structures were energy minimized using the PMEMD module of the Amber14 software<sup>2</sup>. The energy minimization protocol involved 4 separate minimization procedures with gradually decreasing harmonic restraints on heavy atoms in the first 3 minimization procedures with a restraint force constant of 500 kcal mol<sup>-1</sup> Å<sup>-2</sup>, 100 kcal mol<sup>-1</sup> Å<sup>-2</sup> and 5 kcal mol<sup>-1</sup> Å<sup>-2</sup>, respectively. In the final minimization procedure, no positional restraints were used. For each minimization procedure, 500 steps of steepest-descent minimization followed by 500 steps of conjugate-gradient minimization were applied. Minimization was performed using implicit solvent and a distance dependent dielectric constant ( $\epsilon=4r$ ) was used. The gCOMBINE program<sup>6</sup> was used for the calculation of the Coulombic and LJ interaction energies. The gCOMBINE program decomposes the total Coulombic and LJ energies into an array of energy terms with each energy term corresponding to the interaction energy between one of the amino acid residues of the protein and the bound inhibitor. The subsequent chemometric PLS analysis was also performed using gCOMBINE.

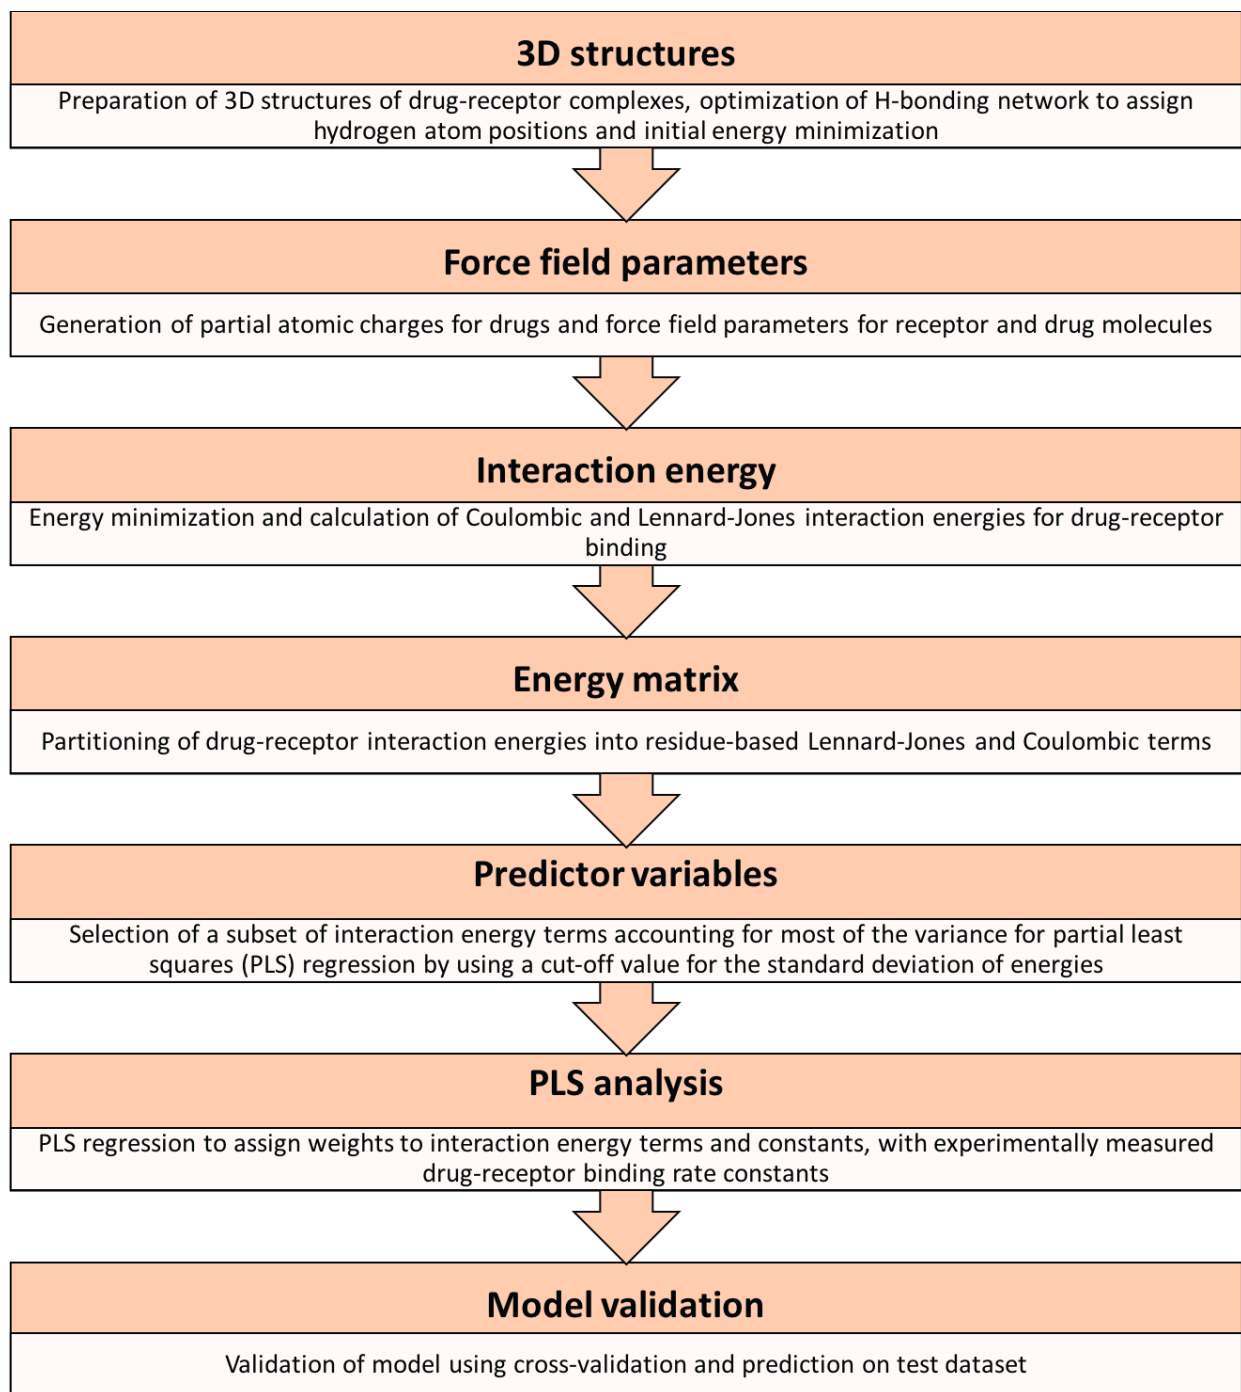

**Figure S1: Schematic outline of the different steps involved in applying COMBINE analysis to derive a QSKR to predict drug-binding kinetics.**

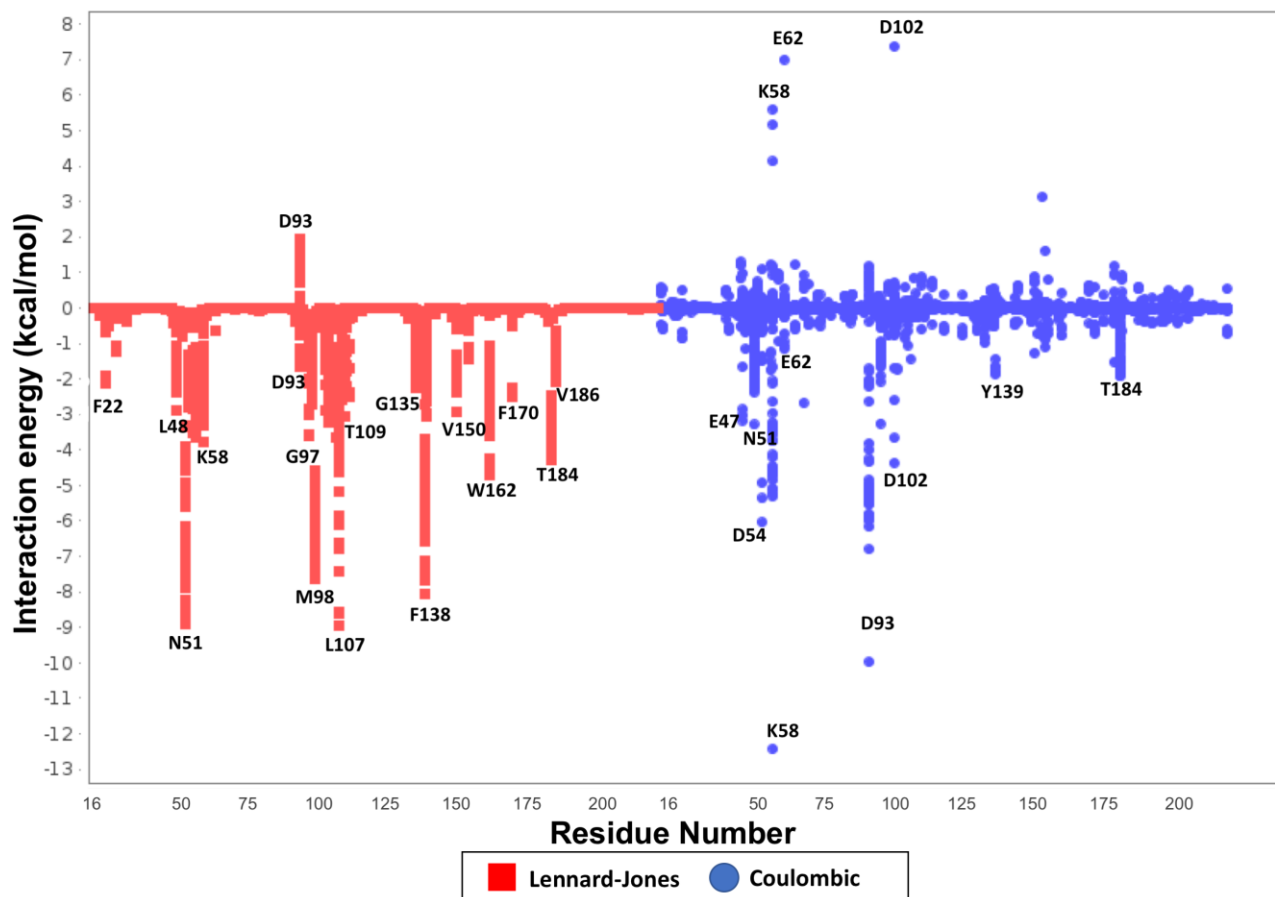

**Figure S2. Interaction energies between N-HSP90 amino acid residues and inhibitors. Lennard-Jones and Coulombic interaction energies were computed between inhibitors and 207 residues in the N-terminal domain of HSP90 using the gCOMBINE program. The first 207 columns on the x-axis correspond to Lennard-Jones energies (kcal/mol) for each residue and the last 207 columns correspond to Coulombic energies (kcal/mol) between each inhibitor and different residues. Each column has 66 data points corresponding to the 66 inhibitors used for the COMBINE analysis. Selected amino acid residues, whose interaction energies with the bound inhibitor show a high variance in the dataset, are labelled.**

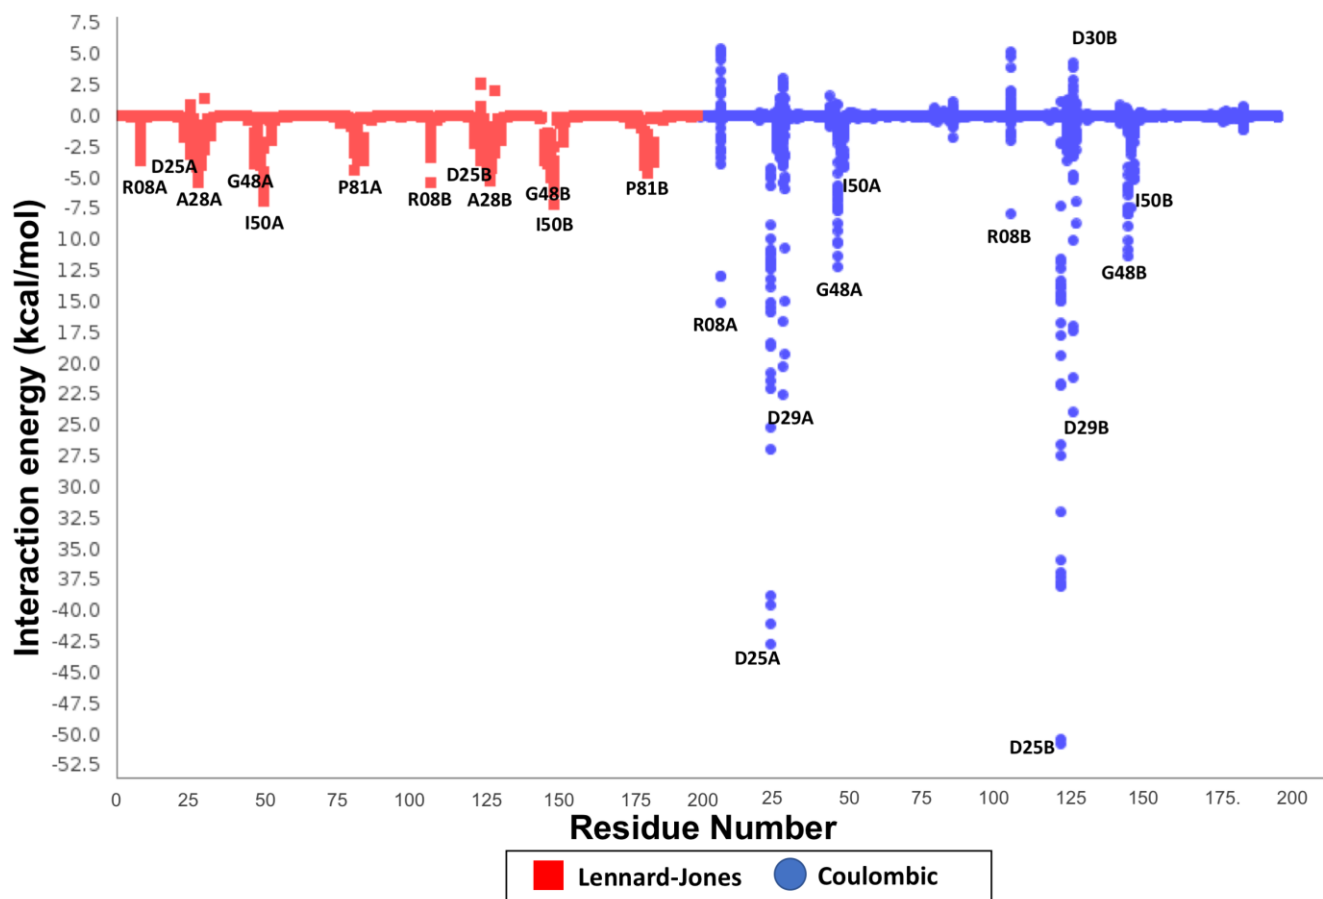

**Figure S3. Interaction energies between HIV-1 protease residues and inhibitors.** Lennard-Jones and Coulombic interaction energies were computed between the inhibitors and 198 amino acid residues of the protease dimer using the gCOMBINE program. The first 198 columns on the x-axis correspond to Lennard-Jones energies (kcal/mol) for each residue and the last 198 columns correspond to Coulombic energies (kcal/mol) between each inhibitor and different residues. Each column has 33 data points corresponding to the 33 inhibitors used for the COMBINE analysis. Selected amino acid residues, whose interaction energies with the bound inhibitor show a high variance in the dataset, are labelled.

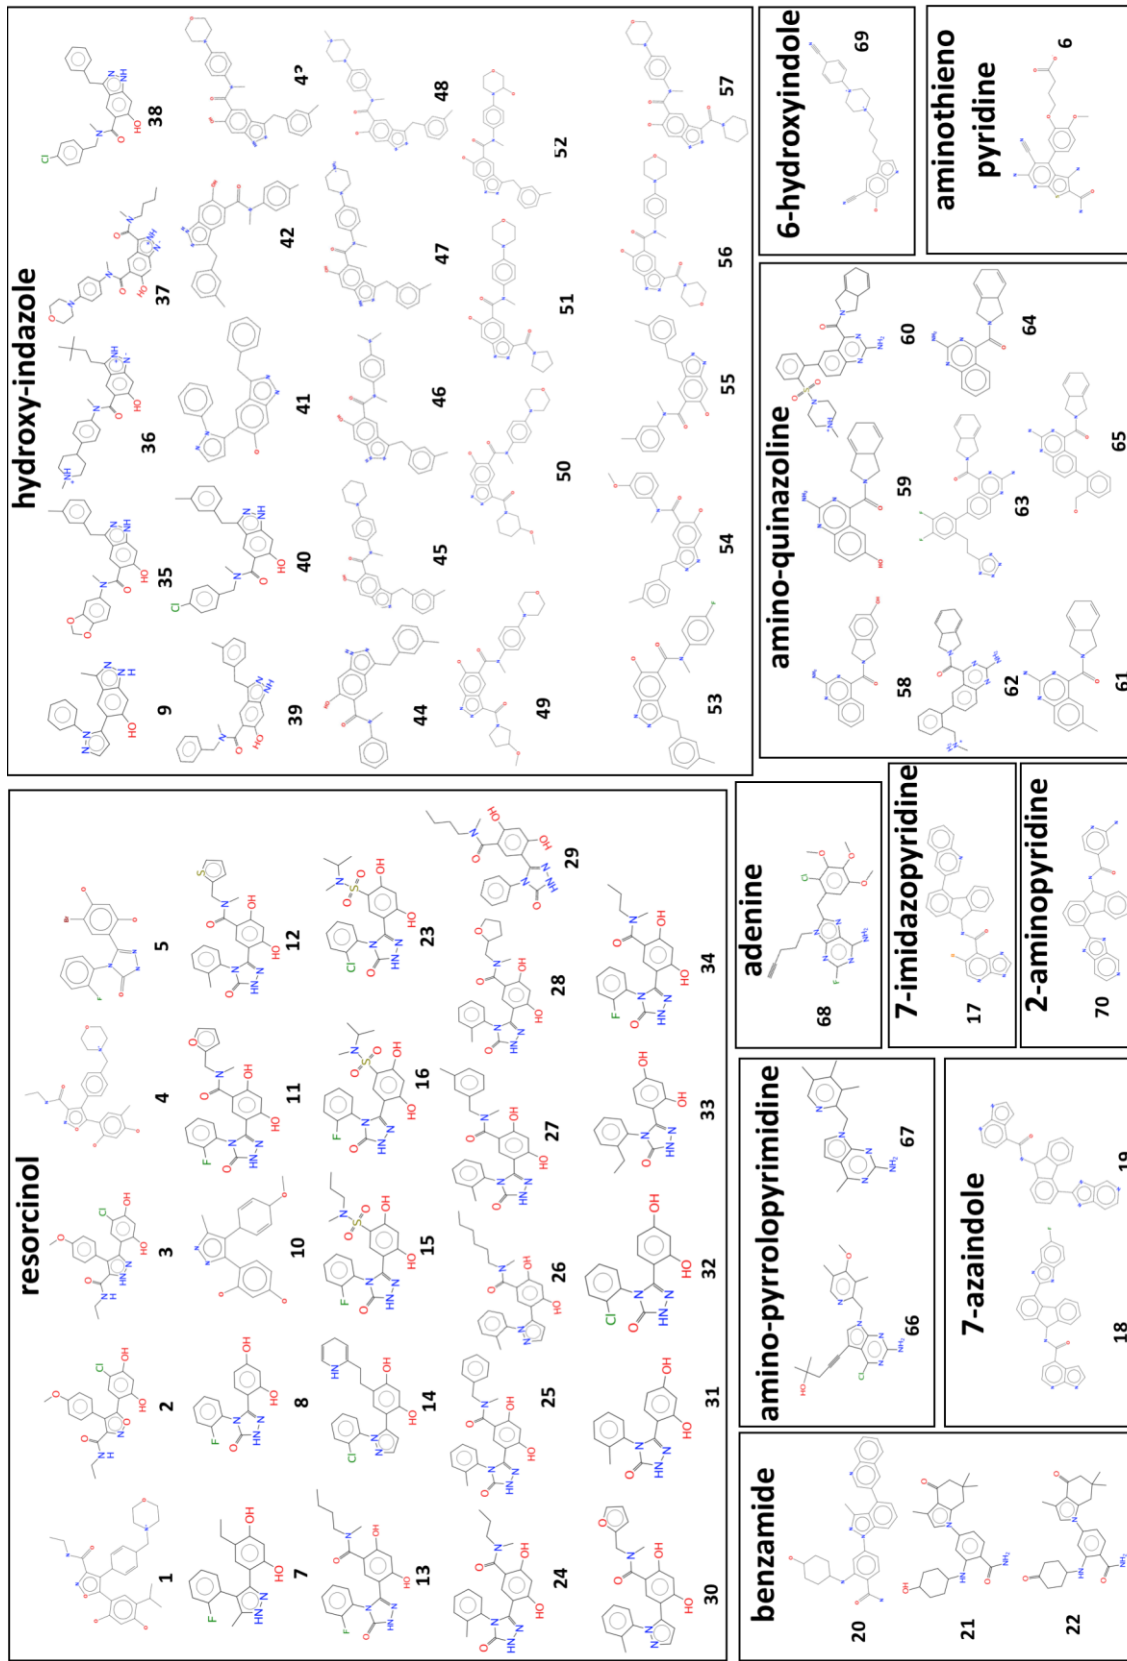

Figure S4: 2D chemical structures of inhibitors of HSP90 used for the COMBINE analysis. These 70 inhibitors belong to 11 different chemical classes: resorcinol, hydroxyl-indazole, aminoquinazoline, benzamide, aminopyrrolopyrimidine, 7-imidazopyridine, 7-azaindole, aminothienopyridine, 6-hydroxyindole, adenine and 2-aminopyridine

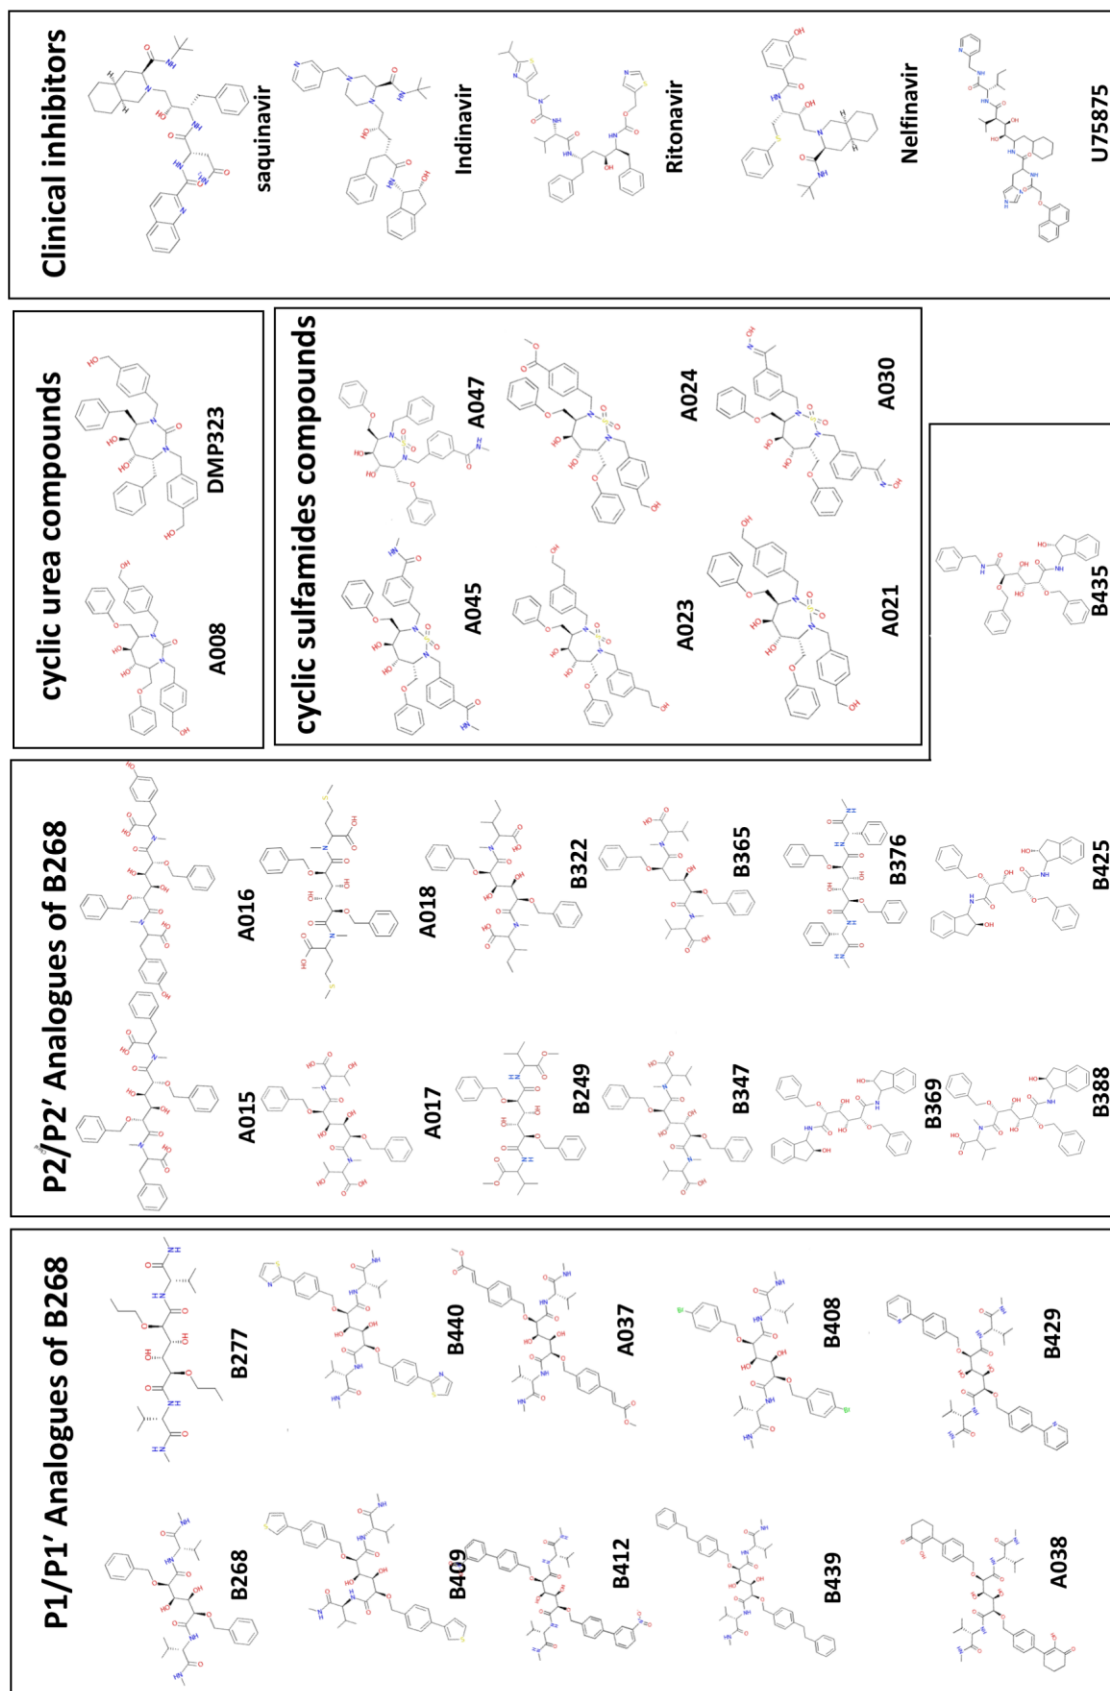

Figure S5: 2D chemical structures of inhibitors of HIV-1 protease used for the COMBINE analysis



**Table S1. Summary of the models derived for different numbers of latent variables (LVs) for the COMBINE analysis for  $k_{off}$  rate constants of N-HSP90 inhibitors. The models were derived using  $\log_{10}(k_{off})$  values (unit of  $k_{off}$  rates in  $s^{-1}$ ) as response variable in the PLS analysis. The table lists the regression coefficient ( $R^2$ ) for the training set, the correlation coefficient for leave-one-out cross validation sets ( $Q^2_{LOO}$ ), average absolute errors ( $AAE_T$  and  $AAE_V$ ) and root mean squared errors ( $RME_T$  and  $RME_V$ ) for the training set and leave-one-out validation sets, respectively, the correlation coefficient ( $R^2_{PRED}$ ) for the test-set (prediction-set), average absolute error ( $AAE_P$ ) and root mean squared error ( $RME_P$ ) for the test-set. The model with 3 LVs displayed the best balance between predictive performance and number of LVs.**

| No. of Latent Variables | $R^2$ | $Q^2_{LOO}$ | $AAE_T$ | $AAE_V$ | $RME_T$ | $RME_V$ | $R^2_{PRED}$ | $AAE_P$ | $RME_P$ |
|-------------------------|-------|-------------|---------|---------|---------|---------|--------------|---------|---------|
| 1                       | 0.43  | 0.31        | 0.61    | 0.67    | 0.78    | 0.85    | 0.33         | 0.60    | 0.79    |
| 2                       | 0.75  | 0.66        | 0.39    | 0.45    | 0.51    | 0.60    | 0.71         | 0.44    | 0.52    |
| 3                       | 0.80  | 0.69        | 0.37    | 0.45    | 0.46    | 0.57    | 0.86         | 0.33    | 0.37    |
| 4                       | 0.82  | 0.72        | 0.35    | 0.44    | 0.44    | 0.55    | 0.87         | 0.32    | 0.35    |
| 5                       | 0.85  | 0.71        | 0.32    | 0.45    | 0.40    | 0.55    | 0.86         | 0.31    | 0.36    |
| 6                       | 0.87  | 0.71        | 0.30    | 0.45    | 0.38    | 0.56    | 0.89         | 0.26    | 0.33    |
| 7                       | 0.88  | 0.69        | 0.27    | 0.45    | 0.36    | 0.58    | 0.89         | 0.27    | 0.33    |
| 8                       | 0.89  | 0.66        | 0.26    | 0.47    | 0.34    | 0.60    | 0.86         | 0.32    | 0.36    |
| 9                       | 0.90  | 0.64        | 0.25    | 0.46    | 0.33    | 0.62    | 0.85         | 0.33    | 0.37    |
| 10                      | 0.91  | 0.55        | 0.23    | 0.51    | 0.31    | 0.70    | 0.69         | 0.48    | 0.54    |

**Table S2. Comparison of  $\log_{10}(k_{off})$  values calculated by the COMBINE analysis model in PLS regression (column 5) and the experimental  $\log_{10}(k_{off})$  values from Kokh et al.<sup>7</sup> (column 4) for different N-HSP90 inhibitors used for training the COMBINE analysis model. The  $\log_{10}(k_{off})$  values predicted from leave-one-out (LOO) cross-validation for the training set of inhibitors are given in the last column.**

| Compound Id | N-HSP90 Binding site conformation: loop or helix | PDB ID | Experimental $\log_{10}(k_{off} (s^{-1}))^7$ | Fitted $\log_{10}(k_{off} (s^{-1}))$ (PLS regression) | Predicted $\log_{10}(k_{off}(s^{-1}))$ (LOO cross-validation) |
|-------------|--------------------------------------------------|--------|----------------------------------------------|-------------------------------------------------------|---------------------------------------------------------------|
| 1           | loop                                             | 2VCI   | -4.00 ± 0.00                                 | -3.45                                                 | -2.57                                                         |
| 3           | loop                                             | 2BSM   | -2.00 ± 0.04                                 | -2.54                                                 | -2.47                                                         |
| 5           | loop                                             | 5J2X   | -1.85 ± 0.07                                 | -1.21                                                 | -1.16                                                         |
| 7           | loop                                             | 6ELO   | -1.20 ± 0.02                                 | -0.77                                                 | -0.65                                                         |
| 8           | loop                                             | 5J64   | -0.68 ± 0.07                                 | -0.60                                                 | -0.65                                                         |
| 9           | loop                                             | n.a.   | -0.08 ± 0.03                                 | -0.86                                                 | -1.13                                                         |
| 10          | loop                                             | 6ELN   | -0.60 ± 0.03                                 | -1.12                                                 | -1.25                                                         |
| 11          | helix                                            | 5J20   | -3.48 ± 0.03                                 | -2.47                                                 | -2.37                                                         |
| 12          | helix                                            | 5J86   | -2.75 ± 0.09                                 | -2.80                                                 | -2.79                                                         |
| 13          | helix                                            | 5J9X   | -2.77 ± 0.12                                 | -2.43                                                 | -2.41                                                         |
| 14          | helix                                            | 6ELP   | -0.76 ± 0.06                                 | -1.91                                                 | -2.16                                                         |
| 15          | helix                                            | 5J27   | -2.19 ± 0.03                                 | -2.02                                                 | -2.00                                                         |
| 16          | helix                                            | 5J86   | -1.85 ± 0.05                                 | -2.09                                                 | -2.13                                                         |
| 17          | helix                                            | 5LRZ   | -3.56 ± 0.01                                 | -3.99                                                 | -3.89                                                         |
| 18          | helix                                            | 5LR7   | -3.72 ± 0.16                                 | -3.18                                                 | -2.59                                                         |
| 20          | helix                                            | 5LQ9   | -3.87 ± 0.01                                 | -4.18                                                 | -4.11                                                         |
| 21          | helix                                            | 5LS1   | -3.31 ± 0.12                                 | -2.89                                                 | -2.80                                                         |
| 22          | helix                                            | 5T21   | -3.12 ± 0.03                                 | -2.61                                                 | -2.52                                                         |
| 23          | helix                                            | n.a.   | -2.02 ± 0.02                                 | -1.80                                                 | -1.76                                                         |
| 24          | helix                                            | n.a.   | -2.33 ± 0.07                                 | -2.06                                                 | -2.04                                                         |
| 27          | helix                                            | n.a.   | -2.92 ± 0.04                                 | -2.53                                                 | -2.52                                                         |
| 28          | helix                                            | n.a.   | -2.34 ± 0.08                                 | -2.59                                                 | -2.66                                                         |
| 29          | helix                                            | n.a.   | -2.52 ± 0.04                                 | -2.43                                                 | -2.44                                                         |
| 31          | loop                                             | n.a.   | -0.96 ± 0.17                                 | -1.26                                                 | -1.34                                                         |

|    |       |      |              |       |       |
|----|-------|------|--------------|-------|-------|
| 33 | loop  | n.a. | -1.15 ± 0.10 | -0.64 | -0.58 |
| 36 | helix | 5LO6 | -2.86 ± 0.12 | -3.21 | -3.32 |
| 37 | helix | 5LNZ | -2.70 ± 0.04 | -3.13 | -3.14 |
| 38 | helix | 6EY8 | -1.54 ± 0.02 | -2.09 | -2.08 |
| 39 | helix | 6EFU | -1.65 ± 0.02 | -1.95 | -1.93 |
| 40 | helix | 6EY9 | -1.76 ± 0.01 | -2.16 | -2.13 |
| 41 | helix | 6EY8 | -0.63 ± 0.04 | -1.72 | -1.87 |
| 42 | helix | n.a. | -2.30 ± 0.08 | -2.19 | -2.17 |
| 43 | helix | 5OCI | -3.17 ± 0.00 | -2.81 | -2.77 |
| 44 | helix | n.a. | -2.04 ± 0.05 | -1.93 | -1.91 |
| 46 | helix | n.a. | -2.63 ± 0.07 | -2.76 | -2.78 |
| 47 | helix | n.a. | -2.91 ± 0.03 | -2.76 | -2.75 |
| 48 | helix | n.a. | -3.12 ± 0.07 | -2.98 | -2.94 |
| 50 | helix | 5ODX | -3.53 ± 0.02 | -3.34 | -3.28 |
| 51 | helix | 5NYH | -2.62 ± 0.01 | -2.60 | -2.56 |
| 52 | helix | n.a. | -2.86 ± 0.14 | -2.78 | -2.73 |
| 55 | helix | n.a. | -2.11 ± 0.27 | -2.10 | -2.08 |
| 56 | helix | n.a. | -1.88 ± 0.02 | -2.62 | -2.67 |
| 57 | helix | n.a. | -3.04 ± 0.12 | -2.78 | -2.72 |
| 58 | helix | n.a. | -0.26 ± 0.12 | -0.45 | -0.63 |
| 59 | helix | n.a. | -0.24 ± 0.02 | -0.45 | -0.57 |
| 60 | helix | 5OD7 | -3.62 ± 0.11 | -3.85 | -3.64 |
| 62 | helix | 6EI5 | -2.34 ± 0.04 | -2.11 | -2.06 |
| 63 | helix | n.a. | -2.82 ± 0.05 | -2.83 | -3.25 |
| 64 | helix | n.a. | -0.26 ± 0.04 | -0.21 | -0.29 |
| 66 | helix | n.a. | -2.90 ± 0.08 | -2.26 | -2.17 |
| 67 | helix | 5LR1 | -1.59 ± 0.02 | -0.73 | -0.68 |
| 68 | helix | 6EL5 | -1.48 ± 0.02 | -2.04 | -2.19 |
| 70 | helix | 2YKJ | -3.00 ± 0.06 | -2.65 | -2.27 |

**Table S3. Comparison of  $\log_{10}(k_{off})$  values predicted by the COMBINE analysis model and the experimental  $\log_{10}(k_{off})$  values<sup>7</sup> for different N-HSP90 inhibitors used in the test set for validation of the COMBINE analysis model.**

| <b>Compound Id</b> | <b>N-HSP90 binding site confirmation: loop or helix</b> | <b>PDB ID</b> | <b>Experimental <math>\log_{10}(k_{off}(s^{-1}))^7</math></b> | <b>Predicted <math>\log_{10}(k_{off}(s^{-1}))</math> (COMBINE)</b> |
|--------------------|---------------------------------------------------------|---------------|---------------------------------------------------------------|--------------------------------------------------------------------|
| 2                  | loop                                                    | 2UWD          | $-2.70 \pm 0.03$                                              | -2.45                                                              |
| 4                  | loop                                                    | 5NYI          | $-4.00 \pm 0.00$                                              | -3.77                                                              |
| 19                 | helix                                                   | 2YKI          | $-3.55 \pm 0.07$                                              | -3.23                                                              |
| 25                 | helix                                                   | n.a.          | $-2.96 \pm 0.21$                                              | -2.45                                                              |
| 26                 | helix                                                   | n.a.          | $-2.00 \pm 0.07$                                              | -2.44                                                              |
| 32                 | loop                                                    | n.a.          | $-0.92 \pm 0.07$                                              | -1.32                                                              |
| 34                 | helix                                                   | n.a.          | $-2.38 \pm 0.05$                                              | -2.90                                                              |
| 35                 | helix                                                   | 6EYA          | $-2.27 \pm 0.03$                                              | -2.31                                                              |
| 45                 | helix                                                   | n.a.          | $-3.13 \pm 0.05$                                              | -2.67                                                              |
| 49                 | helix                                                   | n.a.          | $-2.86 \pm 0.06$                                              | -2.91                                                              |
| 53                 | helix                                                   | n.a.          | $-1.50 \pm 0.22$                                              | -1.96                                                              |
| 54                 | helix                                                   | n.a.          | $-1.79 \pm 0.10$                                              | -2.24                                                              |
| 61                 | helix                                                   | n.a.          | $-0.58 \pm 0.12$                                              | -0.42                                                              |

**Table S4. Summary of the models derived for different numbers of latent variables (LVs) for the COMBINE analysis for  $k_{off}$  rate constants of HIV-1 protease inhibitors. The models were derived using  $\log_{10}(k_{off})$  (unit of  $k_{off}$  rates in  $s^{-1}$ ) as the response variable in the PLS analysis. The table lists the regression coefficient ( $R^2$ ) for the training set, the correlation coefficient for leave-one-out cross validation sets ( $Q^2_{LOO}$ ), average absolute errors ( $AAE_T$  and  $AAE_V$ ) and root mean squared errors ( $RME_T$  and  $RME_V$ ) for the training set and leave-one-out validation sets, respectively. The model with 6 LVs displayed the best predictive performance and least sensitivity in different cross-validation methods used.**

| No. of Latent Variables | $R^2$ | $Q^2_{LOO}$ | $AAE_T$ | $AAE_V$ | $RME_T$ | $RME_V$ |
|-------------------------|-------|-------------|---------|---------|---------|---------|
| 1                       | 0.20  | 0.01        | 1.03    | 1.14    | 1.23    | 1.36    |
| 2                       | 0.38  | -0.01       | 0.86    | 1.09    | 1.09    | 1.38    |
| 3                       | 0.56  | 0.06        | 0.70    | 1.02    | 0.91    | 1.33    |
| 4                       | 0.74  | 0.34        | 0.55    | 0.89    | 0.70    | 1.11    |
| 5                       | 0.83  | 0.38        | 0.46    | 0.83    | 0.57    | 1.08    |
| 6                       | 0.94  | 0.70        | 0.26    | 0.58    | 0.34    | 0.75    |
| 7                       | 0.96  | 0.77        | 0.23    | 0.52    | 0.27    | 0.66    |
| 8                       | 0.97  | 0.83        | 0.20    | 0.47    | 0.23    | 0.57    |
| 9                       | 0.98  | 0.83        | 0.18    | 0.47    | 0.20    | 0.56    |
| 10                      | 0.98  | 0.83        | 0.16    | 0.48    | 0.19    | 0.57    |

**Table S5. Comparison of  $\log_{10}(k_{off})$  values calculated by the COMBINE analysis model in PLS regression (column 4) and the experimental  $\log_{10}(k_{off})$  values from Markgren et al.<sup>8</sup> (column 3) for different HIV-1 protease inhibitors used for training the COMBINE analysis model. The  $\log_{10}(k_{off})$  values predicted from leave-one-out (LOO) cross-validation for the training set of inhibitors are given in the last column.**

| Compound Id | PDB ID | Experimental<br>$\log_{10}(k_{off}(s^{-1}))$ | Fitted<br>$\log_{10}(k_{off}(s^{-1}))$<br>(PLS regression) | Predicted<br>$\log_{10}(k_{off}(s^{-1}))$<br>(LOO cross-validation) |
|-------------|--------|----------------------------------------------|------------------------------------------------------------|---------------------------------------------------------------------|
| B435        | 1D4H   | -2.19 ± 0.09                                 | -1.48                                                      | -1.36                                                               |
| A047        | 1G2K   | -1.16 ± 0.10                                 | -0.81                                                      | -0.74                                                               |
| A023        | n.a.   | -0.86 ± 0.11                                 | -0.66                                                      | -0.05                                                               |
| A024        | 1G35   | -1.16 ± 0.10                                 | -1.30                                                      | -1.44                                                               |
| B429        | n.a.   | -3.43 ± 0.09                                 | -3.71                                                      | -3.69                                                               |
| B409        | 1EC1   | -3.37 ± 0.13                                 | -3.21                                                      | -3.16                                                               |
| B268        | n.a.   | -2.44 ± 0.05                                 | -2.43                                                      | -2.49                                                               |
| A045        | n.a.   | -0.58 ± 0.09                                 | -0.90                                                      | -1.00                                                               |
| B425        | 1D4I   | -0.63 ± 0.00                                 | -1.62                                                      | -2.06                                                               |
| A021        | n.a.   | -1.56 ± 0.04                                 | -1.16                                                      | -0.94                                                               |
| saquinavir  | 3OXC   | -3.64 ± 0.06                                 | -4.00                                                      | -3.72                                                               |
| indinavir   | 2BPX   | -2.80 ± 0.04                                 | -2.35                                                      | -0.77                                                               |
| ritonavir   | 1HXW   | -2.67 ± 0.06                                 | -2.39                                                      | -1.69                                                               |
| DMP323      | 1QBS   | 1.92 ± 0.12                                  | 1.91                                                       | 1.41                                                                |
| nelfinavir  | 1OHR   | -3.18 ± 0.04                                 | -3.07                                                      | -2.08                                                               |
| B369        | 1EBY   | -1.88 ± 0.19                                 | -2.09                                                      | -2.38                                                               |
| B388        | n.a.   | -1.64 ± 0.15                                 | -1.66                                                      | -1.67                                                               |
| A038        | n.a.   | -3.31 ± 0.02                                 | -3.01                                                      | -1.89                                                               |
| A037        | n.a.   | -3.44 ± 0.04                                 | -3.57                                                      | -3.05                                                               |
| B440        | n.a.   | -3.52 ± 0.02                                 | -3.54                                                      | -3.51                                                               |
| B439        | n.a.   | -2.79 ± 0.06                                 | -2.87                                                      | -2.89                                                               |
| B408        | n.a.   | -2.77 ± 0.02                                 | -2.52                                                      | -2.37                                                               |
| B412        | n.a.   | -3.09 ± 0.19                                 | -3.28                                                      | -3.29                                                               |
| A008        | n.a.   | 1.64 ± 0.15                                  | 1.45                                                       | 0.51                                                                |
| B277        | n.a.   | -2.31 ± 0.17                                 | -2.07                                                      | -1.96                                                               |
| A030        | n.a.   | -1.38 ± 0.13                                 | -1.00                                                      | -0.71                                                               |
| A015        | n.a.   | -0.03 ± 0.37                                 | -0.78                                                      | -1.35                                                               |

|      |      |                  |       |       |
|------|------|------------------|-------|-------|
| A016 | n.a. | $-1.22 \pm 0.22$ | -1.37 | -1.50 |
| A017 | n.a. | $-0.75 \pm 0.09$ | -0.61 | -0.71 |
| B322 | n.a. | $-1.17 \pm 0.29$ | -1.43 | -1.60 |
| B365 | n.a. | $-1.51 \pm 0.06$ | -1.52 | -1.60 |
| B347 | n.a. | $-1.57 \pm 0.05$ | -1.31 | -0.88 |
| A018 | n.a. | $-0.32 \pm 0.20$ | -0.43 | -1.28 |

**Table S6.** Summary of the models derived for different numbers of latent variables (LVs) for the COMBINE analysis for the  $K_D$  of the N-HSP90 inhibitors. The models were derived using  $\log_{10}(K_D)$  (unit of  $K_D$  is M) as the response variable in the PLS analysis. For deriving the model for  $K_D$ , the full dataset of 66 compounds was initially used for training. 3 outliers (compounds 17, 50 and 67) were later removed from the PLS analysis to improve the quality of the model. Therefore, the final model for  $K_D$  was trained with 63 compounds. The table lists the regression coefficient ( $R^2$ ) for the training set, the correlation coefficient for leave-one-out cross validation sets ( $Q^2_{LOO}$ ), average absolute errors ( $AAE_T$  and  $AAE_V$ ) and root mean squared errors ( $RME_T$  and  $RME_V$ ) for the training set and leave-one-out validation sets, respectively. The model with 3 LVs displayed the best balance between predictive performance and number of LVs used for PLS.

| No. of Latent Variables | $R^2$ | $Q^2_{LOO}$ | $AAE_T$ | $AAE_V$ | $RME_T$ | $RME_V$ |
|-------------------------|-------|-------------|---------|---------|---------|---------|
| 1                       | 0.33  | 0.13        | 0.66    | 0.74    | 0.90    | 1.02    |
| 2                       | 0.55  | 0.34        | 0.58    | 0.68    | 0.73    | 0.89    |
| 3                       | 0.59  | 0.41        | 0.57    | 0.67    | 0.70    | 0.84    |
| 4                       | 0.64  | 0.39        | 0.52    | 0.67    | 0.66    | 0.85    |
| 5                       | 0.69  | 0.40        | 0.49    | 0.67    | 0.61    | 0.85    |
| 6                       | 0.70  | 0.32        | 0.48    | 0.68    | 0.60    | 0.90    |
| 7                       | 0.72  | 0.16        | 0.47    | 0.74    | 0.58    | 1.00    |
| 8                       | 0.74  | 0.09        | 0.45    | 0.76    | 0.56    | 1.04    |
| 9                       | 0.74  | -0.17       | 0.44    | 0.82    | 0.55    | 1.18    |
| 10                      | 0.75  | -0.75       | 0.44    | 0.91    | 0.54    | 1.44    |

**Table S7.** Statistical measures of correlation for the COMBINE analysis model derived for  $K_D$  of N-HSP90 inhibitors. The table lists the cross-validated correlation coefficient ( $Q^2$ ), average absolute error ( $AAE_V$ ) and root mean squared error ( $RME_V$ ) for different validation methods used. These statistical measures correspond to a model derived with 3 latent variables in PLS analysis.

| Validation                         | $R^2$ | $Q^2$ | $AAE_V$ | $RME_V$ |
|------------------------------------|-------|-------|---------|---------|
| Leave-one-out (LOO)                | 0.59  | 0.41  | 0.67    | 0.84    |
| Leave-two-out (L2O)                | 0.59  | 0.41  | 0.68    | 0.84    |
| Leave-three-out (L3O)              | 0.59  | 0.38  | 0.70    | 0.86    |
| Random groups of 7 (10 iterations) | 0.59  | 0.37  | 0.69    | 0.87    |



**Table S8. Summary of the models derived for different numbers of latent variables (LVs) for the COMBINE analysis for  $K_D$  for the HIV-1 protease inhibitors. The models were derived using  $\log_{10}(K_D)$  (unit of  $K_D$  is M) as the response variable in the PLS analysis. For deriving the model for  $K_D$ , the full dataset of 36 compounds was initially used for training. 3 outliers (compounds B435, A037 and B249) were later removed from the PLS analysis to improve the quality of the model. Therefore, the final model for  $K_D$  was trained with 33 compounds. The table lists the regression coefficient ( $R^2$ ) for the training set, the correlation coefficient for leave-one-out cross validation sets ( $Q^2_{LOO}$ ), average absolute errors ( $AAE_T$  and  $AAE_V$ ) and root mean squared errors ( $RME_T$  and  $RME_V$ ) for the training set and leave-one-out validation sets, respectively. The model with 6 LVs displayed the best balance between predictive performance and number of LVs used for PLS.**

| No. of Latent Variables | $R^2$ | $Q^2_{LOO}$ | $AAE_T$ | $AAE_V$ | $RME_T$ | $RME_V$ |
|-------------------------|-------|-------------|---------|---------|---------|---------|
| 1                       | 0.30  | 0.08        | 1.04    | 1.22    | 1.23    | 1.42    |
| 2                       | 0.39  | 0.16        | 0.95    | 1.13    | 1.15    | 1.35    |
| 3                       | 0.55  | 0.27        | 0.78    | 1.05    | 0.99    | 1.26    |
| 4                       | 0.64  | 0.37        | 0.68    | 0.96    | 0.88    | 1.17    |
| 5                       | 0.69  | 0.45        | 0.63    | 0.85    | 0.82    | 1.09    |
| 6                       | 0.78  | 0.53        | 0.50    | 0.79    | 0.69    | 1.02    |
| 7                       | 0.80  | 0.53        | 0.47    | 0.78    | 0.65    | 1.01    |
| 8                       | 0.83  | 0.53        | 0.45    | 0.76    | 0.60    | 1.01    |
| 9                       | 0.86  | 0.43        | 0.41    | 0.89    | 0.54    | 1.11    |
| 10                      | 0.89  | 0.24        | 0.39    | 1.01    | 0.50    | 1.28    |

**Table S9. Statistical measures of correlation for the COMBINE analysis model derived for  $K_D$  of HIV-1 protease inhibitors. The table lists the cross-validated correlation coefficient ( $Q^2$ ), average absolute error ( $AAE_V$ ) and root mean squared error ( $RME_V$ ) for different validation methods used. These statistical measures correspond to a model derived with 6 latent variables in PLS analysis.**

| Validation                         | $R^2$ | $Q^2$ | $AAE_V$ | $RME_V$ |
|------------------------------------|-------|-------|---------|---------|
| Leave-one-out (LOO)                | 0.78  | 0.53  | 0.79    | 1.02    |
| Leave-two-out (L2O)                | 0.78  | 0.46  | 0.81    | 1.08    |
| Leave-three-out (L3O)              | 0.78  | 0.44  | 0.81    | 1.10    |
| Random groups of 5 (10 iterations) | 0.78  | 0.48  | 0.83    | 1.06    |

**Table S10. Statistical measures of correlation for the COMBINE analysis model derived for the  $K_D$  for the resorcinol series of inhibitors of HSP90. The models were derived using  $\log_{10}(K_D)$  (unit of  $K_D$  is M) as the response variable in the PLS analysis. For deriving the model for  $K_D$ , a smaller dataset of 25 compounds belonging to the resorcinol series was used for training. 3 outliers (compounds 23, 28, 30) were later removed from the PLS analysis to improve the quality of the model. Therefore, the final model for  $K_D$  was trained with 22 compounds. The table lists the cross-validated correlation coefficients ( $Q^2$ ), average absolute error ( $AAE_v$ ) and root mean squared error ( $RME_v$ ) for different validation methods used. These statistical measures correspond to a model derived with 4 latent variables in PLS analysis.**

| Validation                            | $R^2$ | $Q^2$ | $AAE_v$ | $RME_v$ |
|---------------------------------------|-------|-------|---------|---------|
| Leave-one-out (LOO)                   | 0.79  | 0.49  | 0.47    | 0.57    |
| Leave-two-out (L2O)                   | 0.79  | 0.45  | 0.47    | 0.59    |
| Leave-three-out (L3O)                 | 0.79  | 0.47  | 0.46    | 0.58    |
| Random groups of 5<br>(10 iterations) | 0.79  | 0.43  | 0.49    | 0.61    |

**Table S11. List of the SMILES strings for the HSP90 inhibitors.**

| Compound Id | SMILES                                                                               |
|-------------|--------------------------------------------------------------------------------------|
| 1           | <chem>CCNC(=O)c1noc(-c2cc(C(C)C)c(O)cc2O)c1-c1ccc(C[NH+]2CCOCC2)cc1</chem>           |
| 2           | <chem>CCNC(=O)c1noc(-c2cc(Cl)c(O)cc2O)c1-c1ccc(OC)cc1</chem>                         |
| 3           | <chem>CCNC(=O)c1[nH]nc(-c2cc(Cl)c(O)cc2O)c1-c1ccc(OC)cc1</chem>                      |
| 4           | <chem>CCNC(=O)c1noc(c2cc(Cl)c(O)cc2O)c1c3ccc(C[NH+]4CCOCC4)cc3</chem>                |
| 5           | <chem>O=c1[nH]nc(-c2cc(Br)c(O)cc2O)n1-c1ccccc1F</chem>                               |
| 6           | <chem>COc1ccc(-c2c(C#N)c(N)nc3sc(C(N)=O)c(N)c23)cc1OCCCC(=O)O</chem>                 |
| 7           | <chem>CCc1cc(-c2n[nH]c(C)c2-c2ccccc2F)c(O)cc1O</chem>                                |
| 8           | <chem>O=c1[nH]nc(-c2ccc(O)cc2O)n1-c1ccccc1F</chem>                                   |
| 9           | <chem>Cc1n[nH]c2cc(O)c(-c3ccnn3-c3ccccc3)cc12</chem>                                 |
| 10          | <chem>COc1ccc(-c2c(-c3ccc(O)cc3O)n[nH]c2C)cc1</chem>                                 |
| 11          | <chem>CN(Cc1ccc1)C(=O)c1cc(-c2n[nH]c(=O)n2-c2ccccc2F)c(O)cc1O</chem>                 |
| 12          | <chem>Cc1ccccc1-n1c(-c2cc(C(=O)N(C)Cc3cccs3)c(O)cc2O)n[nH]c1=O</chem>                |
| 13          | <chem>CCCCN(C)C(=O)c1cc(-c2n[nH]c(=O)n2-c2ccccc2F)c(O)cc1O</chem>                    |
| 14          | <chem>Oc1cc(O)c(-c2ccnn2-c2ccccc2Cl)cc1CCc1cccn1</chem>                              |
| 15          | <chem>CCCN(C)S(=O)(=O)c1cc(-c2n[nH]c(=O)n2-c2ccccc2F)c(O)cc1O</chem>                 |
| 16          | <chem>CC(C)N(C)S(=O)(=O)c1cc(-c2n[nH]c(=O)n2-c2ccccc2F)c(O)cc1O</chem>               |
| 17          | <chem>BrC1cnc2[nH]cnc2c1C(=O)NC1c2ccccc2-c2c(-c3cnc4ccccc4c3)cccc21</chem>           |
| 19          | <chem>O=C(NC1c2ccccc2-c2c(-c3nc4cncnc4[nH]3)cccc21)c1cnc2[nH]ccc12</chem>            |
| 20          | <chem>Cc1mn(-c2ccc(C(N)=O)c(N[C@H]3CC[C@H](O)CC3)c2)c2ccc(-c3cnc4ccccc4c3)c12</chem> |
| 21          | <chem>Cc1en(-c2ccc(C(N)=O)c(N[C@H]3CC[C@H](O)CC3)c2)c2c1C(=O)CC(C)(C)C2</chem>       |
| 22          | <chem>Cc1en(-c2ccc(C(N)=O)c(NC3CCC(=O)CC3)c2)c2c1C(=O)CC(C)(C)C2</chem>              |
| 23          | <chem>CC(C)N(C)S(=O)(=O)c1cc(-c2n[nH]c(=O)n2-c2ccccc2Cl)c(O)cc1O</chem>              |
| 24          | <chem>CCCN(C)C(=O)c1cc(-c2n[nH]c(=O)n2-c2ccccc2C)c(O)cc1O</chem>                     |
| 25          | <chem>Cc1ccccc1-n1c(-c2cc(C(=O)N(C)Cc3ccccc3)c(O)cc2O)n[nH]c1=O</chem>               |

|    |                                                                       |
|----|-----------------------------------------------------------------------|
| 26 | CCCCCN(C)C(=O)c1cc(-c2cenn2-c2ccccc2C)c(O)cc1O                        |
| 27 | Cc1cccc(CN(C)C(=O)c2cc(-c3n[nH]c(=O)n3-c3ccccc3C)c(O)cc2O)c1          |
| 28 | Cc1ccccc1-n1c(-c2cc(C(=O)N(C)CC3CCCO3)c(O)cc2O)n[nH]c1=O              |
| 29 | CCCCN(C)C(=O)c1cc(-c2n[nH]c(=O)n2-c2ccccc2)c(O)cc1O                   |
| 30 | Cc1ccccc1-n1nccc1-c1cc(C(=O)N(C)Cc2ccco2)c(O)cc1O                     |
| 31 | Cc1ccccc1-n1c(-c2ccc(O)cc2O)n[nH]c1=O                                 |
| 32 | O=c1[nH]nc(-c2ccc(O)cc2O)n1-c1ccccc1Cl                                |
| 33 | CCc1ccccc1-n1c(-c2ccc(O)cc2O)n[nH]c1=O                                |
| 34 | CCCN(C)C(=O)c1cc(-c2n[nH]c(=O)n2-c2ccccc2F)c(O)cc1O                   |
| 35 | Cc1cccc(Cc2n[nH]c3cc(O)c(C(=O)N(C)c4ccc5c(c4)OCO5)cc23)c1             |
| 36 | C[NH+]1CCC(c2ccc(N(C)C(=O)c3cc4c(CCC(C)(C)C)n[nH]c4cc3O)cc2)CC1       |
| 37 | CCCCN(C)C(=O)c1n[nH]c2cc(O)c(C(=O)N(C)c3ccc(N4CCOCC4)cc3)cc12         |
| 38 | CN(Cc1ccc(Cl)cc1)C(=O)c2cc3c(Cc4ccccc4)n[nH]c3cc2O                    |
| 39 | Cc1cccc(Cc2n[nH]c3cc(O)c(C(=O)N(C)Cc4ccccc4)cc23)c1                   |
| 40 | Cc1cccc(Cc2n[nH]c3cc(O)c(C(=O)N(C)Cc4ccc(Cl)cc4)cc23)c1               |
| 41 | Oc1cc2[nH]nc(Cc3ccccc3)c2cc1-c1cenn1-c1ccccc1                         |
| 42 | Cc1ccc(N(C)C(=O)c2cc3c(Cc4cccc(C)c4)n[nH]c3cc2O)cc1                   |
| 43 | Cc1cccc(Cc2n[nH]c3cc(O)c(C(=O)N(C)c4ccc(N5CCOCC5)cc4)cc23)c1          |
| 44 | Cc1cccc(Cc2n[nH]c3cc(O)c(C(=O)N(C)c4ccccc4)cc23)c1                    |
| 45 | Cc1cccc(Cc2n[nH]c3cc(O)c(C(=O)N(C)c4ccc(N5CCCC5)cc4)cc23)c1           |
| 46 | Cc1cccc(Cc2n[nH]c3cc(O)c(C(=O)N(C)c4ccc(N(C)C)cc4)cc23)c1             |
| 47 | Cc1cccc(Cc2n[nH]c3cc(O)c(C(=O)N(C)c4ccc(N5CC[NH2+]CC5)cc4)cc23)c1     |
| 48 | Cc1cccc(Cc2n[nH]c3cc(O)c(C(=O)N(C)c4ccc(N5CCN(C)CC5)cc4)cc23)c1       |
| 49 | CO[C@H]1CCN(C(=O)c2n[nH]c3cc(O)c(C(=O)N(C)c4ccc(N5CCOCC5)cc4)cc23)C1  |
| 50 | CO[C@H]1CCCN(C(=O)c2n[nH]c3cc(O)c(C(=O)N(C)c4ccc(N5CCOCC5)cc4)cc23)C1 |
| 51 | CN(C(=O)c1cc2c(C(=O)N3CCCC3)n[nH]c2cc1O)c1ccc(N2CCOCC2)cc1            |
| 52 | Cc1cccc(Cc2n[nH]c3cc(O)c(C(=O)N(C)c4ccc(N5CCOCC5=O)cc4)cc23)c1        |

|    |                                                                                   |
|----|-----------------------------------------------------------------------------------|
| 53 | <chem>Cc1cccc(Cc2n[nH]c3cc(O)c(C(=O)N(C)c4ccc(F)cc4)cc23)c1</chem>                |
| 54 | <chem>COc1cccc(N(C)C(=O)c2cc3c(Cc4cccc(C)c4)n[nH]c3cc2O)c1</chem>                 |
| 55 | <chem>Cc1cccc(Cc2n[nH]c3cc(O)c(C(=O)N(C)c4cccc(C)c4)cc23)c1</chem>                |
| 56 | <chem>CN(C(=O)c1cc2c(cc1O)[nH]nc2C(=O)N1CCOCC1)c1ccc(N2CCOCC2)cc1</chem>          |
| 57 | <chem>CN(C(=O)c1cc2c(C(=O)N3CCCCC3)n[nH]c2cc1O)c1ccc(N2CCOCC2)cc1</chem>          |
| 58 | <chem>Nc1nc(C(=O)N2Cc3ccc(O)cc3C2)c2cccc2n1</chem>                                |
| 59 | <chem>Nc1nc(C(=O)N2Cc3cccc3C2)c2cc(O)ccc2n1</chem>                                |
| 60 | <chem>C[NH+]1CCN(S(=O)(=O)c2cccc2-c2ccc3nc(N)nc(C(=O)N4Cc5cccc5C4)c3c2)CC1</chem> |
| 61 | <chem>Cc1ccc2nc(N)nc(C(=O)N3Cc4cccc4C3)c2c1</chem>                                |
| 62 | <chem>CNCc1cccc1-c1ccc2nc(N)nc(C(=O)N3Cc4cccc4C3)c2c1</chem>                      |
| 63 | <chem>Nc1nc(C(=O)N2Cc3cccc3C2)c2cc(-c3cc(F)c(F)cc3CCc3nnn[nH]3)ccc2n1</chem>      |
| 64 | <chem>Nc1nc(C(=O)N2Cc3cccc3C2)c2cccc2n1</chem>                                    |
| 65 | <chem>Nc1nc(C(=O)N2Cc3cccc3C2)c2cc(-c3cccc3O)ccc2n1</chem>                        |
| 66 | <chem>COc1c(C)enc(Cn2cc(C#CCC(C)(C)O)c3c(Cl)nc(N)nc32)c1C</chem>                  |
| 67 | <chem>Cc1enc(Cn2ccc3c(Cl)nc(N)nc32)c(C)c1Cl</chem>                                |
| 68 | <chem>C#CCCN1c(Cc2cc(OC)c(OC)c(OC)c2Cl)nc2c(N)nc(F)nc21</chem>                    |
| 69 | <chem>N#Cc1ccc(N2CCN(CCCc3c[nH]c4cc(O)c(C#N)cc34)CC2)cc1</chem>                   |
| 70 | <chem>Nc1cc(C(=O)NC2c3cccc3-c3c(-c4nc5cnc5[nH]4)cccc32)ccn1</chem>                |

**Table S11. List of the SMILES strings for the HIV-1 protease inhibitors.**

| Compound Id | SMILES                                                                                                                                  |
|-------------|-----------------------------------------------------------------------------------------------------------------------------------------|
| B435        | <chem>O[C@H]([C@@H](O)[C@@H](OCc1cccc1)C(=O)NC2[C@H](O)Cc3cccc23)[C@@H](OCc4cccc4)C(=O)NCc5cccc5</chem>                                 |
| A047        | <chem>CNC(=O)c1cccc(CN2[C@H](COc3cccc3)[C@H](O)[C@@H](O)[C@@H](COc4cccc4)N(Cc5cccc5)S2(=O)=O)c1</chem>                                  |
| A023        | <chem>OCCc1cccc(CN2[C@H](COc3cccc3)[C@H](O)[C@@H](O)[C@@H](COc4cccc4)N(Cc5cccc(CCO)c5)S2(=O)=O)c1</chem>                                |
| A024        | <chem>COC(=O)c1ccc(CN2[C@H](COc3cccc3)[C@H](O)[C@@H](O)[C@@H](COc4cccc4)N(Cc5ccc(CO)cc5)S2(=O)=O)cc1</chem>                             |
| B429        | <chem>CNC(=O)[C@@H](NC(=O)[C@H](OCc1ccc(cc1)c2cccn2)[C@H](O)[C@@H](O)[C@@H](OCc3ccc(cc3)c4cccn4)C(=O)N[C@@H](C(C)C)C(=O)NC)C(C)C</chem> |
| B409        | <chem>CNC(=O)[C@@H](NC(=O)[C@H](OCc1ccc(cc1)c2ccsc2)[C@H](O)[C@@H](O)[C@@H](OCc3ccc(cc3)c4ccsc4)C(=O)N[C@@H](C(C)C)C(=O)NC)C(C)C</chem> |
| B268        | <chem>CNC(=O)[C@@H](NC(=O)[C@H](OCc1cccc1)[C@H](O)[C@@H](O)[C@@H](OCc2cccc2)C(=O)N[C@@H](C(C)C)C(=O)NC)C(C)C</chem>                     |
| A045        | <chem>CNC(=O)c1cccc(CN2[C@H](COc3cccc3)[C@H](O)[C@@H](O)[C@@H](COc4cccc4)N(Cc5cccc(c5)C(=O)NC)S2(=O)=O)c1</chem>                        |
| B425        | <chem>O[C@H](C[C@@H](OCc1cccc1)C(=O)NC2[C@H](O)Cc3cccc23)[C@@H](OCc4cccc4)C(=O)NC5[C@@H](O)Cc6cccc56</chem>                             |
| A021        | <chem>OCc1ccc(CN2[C@H](COc3cccc3)[C@H](O)[C@@H](O)[C@@H](COc4cccc4)N(Cc5ccc(CO)cc5)S2(=O)=O)cc1</chem>                                  |
| saquinavir  | <chem>CC(C)(C)NC(=O)[C@@H]1C[C@@H]2CCCC[C@@H]2CN1C[C@@H](O)[C@@H](Cc3cccc3)NC(=O)[C@H](CC(=O)N)NC(=O)c4ccc5cccc5n4</chem>               |
| indinavir   | <chem>CC(C)(C)NC(=O)[C@@H]1CN(Cc2ccnc2)CCN1C[C@@H](O)C[C@@H](Cc3cccc3)C(=O)N[C@@H]4[C@H](O)Cc5cccc45</chem>                             |
| ritonavir   | <chem>CC(C)[C@H](NC(=O)N(C)Cc1esc(n1)C(C)C)C(=O)N[C@H](C[C@H](O)[C@H](Cc2cccc2)NC(=O)OCc3cncs3)Cc4cccc4</chem>                          |
| DMP323      | <chem>OCc1ccc(CN2[C@H](Cc3cccc3)[C@H](O)[C@@H](O)[C@@H](Cc3cccc3)N(Cc3ccc(CO)cc3)C2=O)cc1</chem>                                        |
| nelfinavir  | <chem>Cc1c(O)cccc1C(=O)N[C@H](CSc1cccc1)[C@H](O)CN1C[C@H]2CCCC[C@H]2C[C@H]1C(=O)NC(C)C</chem>                                           |

|        |                                                                                                                                                                       |
|--------|-----------------------------------------------------------------------------------------------------------------------------------------------------------------------|
| B369   | <chem>O[C@H]([C@@H](O)[C@H](OCc1cccc1)C(=O)NC2[C@@H](O)Cc3cccc23)[C@@H](OCc4cccc4)C(=O)NC5[C@H](O)Cc6cccc56</chem>                                                    |
| B388   | <chem>CC(C)C(N(C)C(=O)[C@H](OCc1cccc1)[C@H](O)[C@@H](O)[C@@H](OCc2cccc2)C(=O)NC3[C@@H](O)Cc4cccc34)C(=O)O</chem>                                                      |
| A038   | <chem>CNC(=O)[C@@H](NC(=O)[C@H](OCc1ccc(cc1)C2=C(O)C(=O)CCC2)[C@H](O)[C@@H](O)[C@@H](OCc3ccc(cc3)C4=C(O)C(=O)CCC4)C(=O)N[C@@H](C(C)C)C(=O)NC)C(C)C</chem>             |
| A037   | <chem>CNC(=O)[C@@H](NC(=O)[C@H](OCc1ccc(\C=C\C(=O)OC)cc1)[C@H](O)[C@@H](O)[C@@H](OCc2ccc(\C=C\C(=O)OC)cc2)C(=O)N[C@@H](C(C)C)C(=O)NC)C(C)C</chem>                     |
| B440   | <chem>CNC(=O)[C@@H](NC(=O)[C@H](OCc1ccc(cc1)c2nccs2)[C@H](O)[C@@H](O)[C@@H](OCc3ccc(cc3)c4nccs4)C(=O)N[C@@H](C(C)C)C(=O)NC)C(C)C</chem>                               |
| B439   | <chem>CNC(=O)[C@@H](NC(=O)[C@H](OCc1ccc(CCc2cccc2)cc1)[C@H](O)[C@@H](O)[C@@H](OCc3ccc(CCc4cccc4)cc3)C(=O)N[C@@H](C(C)C)C(=O)NC)C(C)C</chem>                           |
| B408   | <chem>CNC(=O)[C@@H](NC(=O)[C@H](OCc1ccc(Br)cc1)[C@H](O)[C@@H](O)[C@@H](OCc2ccc(Br)cc2)C(=O)N[C@@H](C(C)C)C(=O)NC)C(C)C</chem>                                         |
| B412   | <chem>CNC(=O)[C@@H](NC(=O)[C@H](OCc1ccc(cc1)c2cccc(c2)[N+](=O)[O-])[C@H](O)[C@@H](O)[C@@H](OCc3ccc(cc3)c4cccc(c4)[N+](=O)[O-])C(=O)N[C@@H](C(C)C)C(=O)NC)C(C)C</chem> |
| U75875 | <chem>CC[C@@H](C)[C@H](NC(=O)[C@H](C(C)C)[C@@H](O)[C@H](O)[C@H](C1CCCC1)NC(=O)[C@H](Cc2c[nH+]c[nH]2)NC(=O)COc3cccc4cccc34)C(=O)NCc5ccccn5</chem>                      |
| A008   | <chem>OCc1ccc(CN2C(COc3cccc3)[C@H](O)[C@@H](O)C(COc4cccc4)N(Cc5ccc(CO)cc5)C2=O)cc1</chem>                                                                             |
| B277   | <chem>CCCO[C@H]([C@H](O)[C@@H](O)[C@@H](O)C(=O)N[C@@H](C(C)C)C(=O)NC)C(=O)N[C@@H](C(C)C)C(=O)NC</chem>                                                                |
| A030   | <chem>C\C(=N/O)\c1cccc(CN2[C@H](COc3cccc3)[C@H](O)[C@@H](O)[C@@H](COc4cccc4)N(Cc5cccc(c5)\C(=N/O)\C)S2(=O)=O)c1</chem>                                                |
| A015   | <chem>CN(C(Cc1cccc1)C(=O)O)C(=O)[C@H](OCc2cccc2)[C@H](O)[C@@H](O)[C@@H](OCc3cccc3)C(=O)N(C)C(Cc4cccc4)C(=O)O</chem>                                                   |
| A016   | <chem>CN(C(Cc1ccc(O)cc1)C(=O)O)C(=O)[C@H](OCc2cccc2)[C@H](O)[C@@H](O)[C@@H](OCc3cccc3)C(=O)N(C)C(Cc4ccc(O)cc4)C(=O)O</chem>                                           |
| A017   | <chem>CC(O)C(N(C)C(=O)[C@H](OCc1cccc1)[C@H](O)[C@@H](O)[C@@H](OCc2cccc2)C(=O)N(C)C(C(C)O)C(=O)O)C(=O)O</chem>                                                         |

|      |                                                                                                                            |
|------|----------------------------------------------------------------------------------------------------------------------------|
| B322 | <chem>CCC(C)C(N(C)C(=O)[C@H](OCc1ccccc1)[C@H](O)[C@@H](O)[C@@H](OCc2ccccc2)C(=O)N(C)C(C(C)CC)C(=O)O)C(=O)O</chem>          |
| B365 | <chem>CC(C)C(N(C)C(=O)[C@@H](C[C@@H](O)[C@@H](OCc1ccccc1)C(=O)N(C)C(C(C)C)C(=O)O)OCc2ccccc2)C(=O)O</chem>                  |
| B347 | <chem>CC(C)C(N(C)C(=O)[C@H](OCc1ccccc1)[C@@H](O)[C@H](O)[C@@H](OCc2ccccc2)C(=O)N(C)C(C(C)C)C(=O)O)C(=O)O</chem>            |
| A018 | <chem>CSCCC(N(C)C(=O)[C@H](OCc1ccccc1)[C@H](O)[C@@H](O)[C@@H](OCc2ccccc2)C(=O)N(C)C(CCSC)C(=O)O)C(=O)O</chem>              |
| B249 | <chem>COC(=O)C(NC(=O)[C@H](OCc1ccccc1)[C@H](O)[C@@H](O)[C@@H](OCc2ccccc2)C(=O)NC(C(C)C)C(=O)OC)C(C)C</chem>                |
| B376 | <chem>CNC(=O)[C@@H](NC(=O)[C@H](OCc1ccccc1)[C@H](O)[C@@H](O)[C@@H](OCc2ccccc2)C(=O)N[C@H](C(=O)NC)c3ccccc3)c4ccccc4</chem> |



## Formulas for statistical measures of correlation

1. Regression coefficient ( $R^2$ ):

$$R^2 = \frac{[\sum_{i=1}^N (y_i - \bar{y})(\hat{y}_i - \langle \hat{y} \rangle)]^2}{\sum_{i=1}^N (y_i - \bar{y})^2 \sum_{i=1}^N (\hat{y}_i - \langle \hat{y} \rangle)^2}$$

Where,

$\bar{y}$  is the average value of the experimental activities ( $y_1, y_2, \dots, y_N$ )

$$\bar{y} = \frac{1}{N} \sum_{i=1}^N y_i$$

$\langle \hat{y} \rangle$  is the average value of the calculated activities ( $\hat{y}_1, \hat{y}_2, \dots, \hat{y}_N$ )

$$\langle \hat{y} \rangle = \frac{1}{N} \sum_{i=1}^N \hat{y}_i$$

2. Cross-validated correlation coefficient ( $Q^2$ ):

$$Q^2 = 1 - \frac{\sum_{i=1}^N (y_i - \hat{y}_i)^2}{\sum_{i=1}^N (y_i - \bar{y})^2}$$

3. Average absolute error (AAE):

$$AAE = \frac{1}{N} \sum_{i=1}^N |\hat{y}_i - y_i|$$

4. Root mean squared error (RME)

$$RME = \sqrt{\frac{\sum_{i=1}^N (\hat{y}_i - y_i)^2}{N}}$$

## References:

1. Madhavi Sastry, G.; Adzhigirey, M.; Day, T.; Annabhimoju, R.; Sherman, W. Protein and Ligand Preparation: Parameters, Protocols, and Influence on Virtual Screening Enrichments. *J. Comput.-Aided Mol. Des.* **2013**, *27*, 221–234.
2. Case, D. A.; Babin, V.; Berryman, J. T.; Betz, R. M.; Cai, Q.; Cerutti, D. S.; Cheatham, T. E., III; Darden, T. A.; Duke, R. E.; Gohlke, H.; Goetz, A. W.; Gusarov, S.; Homeyer, N.; Janowski, P.; Kaus, J.; Kolossvary, I.; Kovalenko, A.; Lee, T. S.; LeGrand, S.; Luchko, T.; Luo, R.; Wu, X.; Kollman, P. A. *AMBER 14*; University of California: San Francisco, 2014.
3. Maier, J. A.; Martinez, C.; Kasavajhala, K.; Wickstrom, L.; Hauser, K. E.; Simmerling, C. ff14SB: Improving the Accuracy of Protein Side Chain and Backbone Parameters from ff99SB. *J. Chem. Theory Comput.* **2015**, *11*, 3696–3713.
4. Dupradeau, F.-Y.; Pigache, A.; Zaffran, T.; Savineau, C.; Lelong, R.; Grivel, N.; Lelong, D.; Rosanski, W.; Cieplak, P. The R.E.D. Tools: Advances in RESP and ESP Charge Derivation and Force Field Library Building. *Phys. Chem. Chem. Phys.* **2010**, *12*, 7821–7839.
5. Schmidt, M. W.; Baldridge, K. K.; Boatz, J. A.; Elbert, S. T.; Gordon, M. S.; Jensen, J. H.; Koseki, S.; Matsunaga, N.; Nguyen, K.A.; Su, S.; et al. General Atomic and Molecular Electronic Structure System. *J. Comput. Chem.* **1993**, *14*, 1347–1363.
6. Gil-Redondo, R.; Klett, J.; Gago, F.; Morreale, A. gCOMBINE: A Graphical User Interface to Perform Structure-Based Comparative Binding Energy (COMBINE) Analysis on a Set of Ligand-Receptor Complexes. *Proteins: Struct., Funct., Bioinform.* **2010**, *78*, 162–172.
7. Kokh, D. B.; Amaral, M.; Bomke, J.; Gradler, U.; Musil, D.; Buchstaller, H.-P.; Dreyer, M. K.; Frech, M.; Lowinski, M.; Vallee, F.; et al. Estimation of Drug-Target Residence Times by  $\tau$ -Random Acceleration Molecular Dynamics Simulations. *J. Chem. Theory Comput.* **2018**, *14*, 3859–3869.
8. Markgren, P.-O.; Schaal, W.; Hämäläinen, M.; Karlén, A.; Hallberg, A.; Samuelsson, B.; Danielson, U. H. Relationships between Structure and Interaction Kinetics for HIV-1 Protease Inhibitors. *J. Med. Chem.* **2002**, *45*, 5430–5439.

# Data files for performing COMBINE analysis

## Data files for HSP90 COMBINE analysis:

(m18b00397\_si\_002.zip, size:21.1 MB)

The following 5 files in this zipped folder were used to generate the COMBINE analysis model for the off rate and  $K_D$  of HSP90 inhibitors:

1. hsp90\_energy\_minimized\_pdb\_files.zip  
This zipped file contains 70 energy-minimized structures of N-HSP90-inhibitor complexes in PDB format.
2. hsp90\_amber\_topology\_files.zip  
This zipped file contains 70 topology (.top) files for N-HSP90-inhibitor complexes generated by the LEaP program of Amber 14 using ff14SB and GAFF force fields for protein and inhibitors, respectively. These topology files are required for performing the PLS analysis with the gCOMBINE program. The gCOMBINE program is available under a free academic license and can be used for non-profit or non-commercial use. The source files for gCOMBINE can be downloaded from [https://ub.cbm.uam.es/drug\\_design/combine.php](https://ub.cbm.uam.es/drug_design/combine.php)
3. hsp90\_amber\_coordinate\_files.zip  
This zipped file contains 70 coordinate (.crd) files for N-HSP90-inhibitor complexes generated by the LEaP program of Amber 14 and they are also required by the gCOMBINE program.
4. hsp90\_gCOMBINE\_output\_models.zip  
This zipped file contains output of 3 different COMBINE models generated in this study using gCOMBINE program. These files can be directly loaded into gCOMBINE program (using the Load model option) to visualize the results of PLS analysis.
  - hsp90\_output\_model\_koff  
COMBINE analysis model generated for  $k_{off}$  rates of HSP90 inhibitors.
  - hsp90\_output\_model\_KD  
COMBINE analysis model generated for  $K_D$  (binding affinity) of HSP90 inhibitors.
  - hsp90\_output\_model\_KD\_resorcinol  
COMBINE analysis model generated for  $K_D$  (binding affinity) of resorcinol class of HSP90 inhibitors.
5. Nomenclature\_files.xlsx  
The nomenclature of PDB, coordinate and topology files for protein-inhibitor complexes provided in the zipped files above, is different from the nomenclature of inhibitors used in the manuscript. This Excel spreadsheet provides the mapping between inhibitor names mentioned in the manuscript and their corresponding file names in the zipped folders.

## Data files for HIV COMBINE analysis:

(m18b00397\_si\_003.zip, size:10.5 MB)

The following 5 files in this zipped folder were used to generate the COMBINE analysis model for the off rate and  $K_D$  of HIV-1 protease inhibitors:

1. hiv\_energy\_minimized\_pdb\_files.zip  
This zipped file contains 36 energy-minimized structures of HIV-1 protease-inhibitor complexes in PDB format.
2. hiv\_amber\_topology\_files.zip  
This zipped file contains 36 topology (.top) files for HIV-1 protease-inhibitor complexes generated by the LEaP program of Amber 14 using ff14SB and GAFF force fields for protein and inhibitors, respectively.
3. hiv\_amber\_coordinate\_files.zip  
This zipped file contains 36 coordinate (.crd) files for HIV-1 protease-inhibitor complexes generated by the LEaP program of Amber 14.
4. hiv\_gCOMBINE\_output\_models.zip  
This zipped file contains output of 2 different COMBINE models generated in this study using gCOMBINE program. These files can be directly loaded into gCOMBINE program (using the Load model option) to visualize the results of PLS analysis.
  - hiv\_output\_model\_koff  
COMBINE analysis model generated for  $k_{off}$  rates of HIV-1 protease inhibitors.
  - hiv\_output\_model\_KD  
COMBINE analysis model generated for  $K_D$  (binding affinity) of HIV-1 protease inhibitors.
5. Nomenclature\_files.xlsx  
The nomenclature of PDB, coordinate and topology files for protein-inhibitor complexes provided in the zipped files above, is different from the nomenclature of inhibitors used in the manuscript. This Excel spreadsheet provides the mapping between inhibitor names mentioned in the manuscript and their corresponding file names in the zipped folders.
